# Supplementary material
Source: Research Square preprint supplement (doi:10.21203/rs.3.rs-9114671/v1)
Supplement: Supplementary file 1 [file 1a9c11d570c98943272dc9bf.docx]

**Electronic Supplementary Material**

**Article Title:**

Whole-genome and Comparative Genomic Analysis Reveal the Biocontrol and Plant Growth-Promoting Potential of *Bacillus velezensis* JN.Y2 Against Oat Anthracnose

**Journal Name:**

Functional and Integrative Genomics

**Author Names:**

Wei Quan**1†,** Ting Zhang2, Chen-Lu Liu1, Shao-xuan Shi1, Xi-xi Zhang1, Ke-han Liu1, Chun-Yang Wang1, Ming-min Zhao1, Bao-Zhu Dong1*****, Hong-You Zhou1*****

**Affiliation:** College of Horticulture and Plant Protection, Inner Mongolia Agricultural University, Key Laboratory of Biopesticide Creation and Resource Utilization for Autonomous Region Higher Education Institutions, Hohhot, 010018, China

**E-mail address of the corresponding authors:**

Bao-Zhu Dong*, E-mail: dongbaozhu2020@imau.edu.cn;

Hong-You Zhou*, E-mail: zhouhongyou@imau.edu.cn.

**Online Resource 1 Table S1** Primers used in this study

| Primer name | Sequence (5'–3') | Target / Description | Source |
| --- | --- | --- | --- |
| 16S rRNA-F | AGACTGGGATAACTCCGGGA | Amplifies 16S rRNA gene for molecular identification | This study |
| 16S rRNA-R | ACCTTCCGATACGGCTACCT | - | - |

**Online Resource 1 Table S2** Predicted genes associated with growth-pormoting characters in Bv. JN.Y2 genome

| Bv. JN.Y2-PGP activities detection | Gene name | Gene annotation | Chromosome location |
| --- | --- | --- | --- |
| Nitrogen fixation | *nifH* | 4Fe-4S iron sulfur cluster binding proteins | 99,969-101,021 |
|  | *yutI* | Putative nitrogen fixation protein | 2,997,147-2,997,407 |
|  | *sufB* | Fe-S cluster assemby protein SufB | 3,040,474-3,041,871 |
|  | *sufU* | iron-sulfur cluster assembly scaffold protein SufU | 3,041,891-3,042,334 |
|  | *sufC* | Fe-S cluster assembly ATP-binding protein | 3,044,875-3.945,660 |
|  | *sufD* | Fe-S cluster assembly protein SufD | 3,043,544-3,044,857 |
|  | *nifU* | nitrogen fixation protein NifU | 3,041,891-3,042,334 |
| Phosphate metabolism | *pstA* | phosphate ABC transporter permease PstA | 2,400,060-2,400,944 |
|  | *pstB 1* | Phosphate import ATP-binding protein PstB 1 | 2,398,441-2,399,223 |
|  | *pstB 2* | Phosphate import ATP-binding protein PstB 2 | 2,399,235-2,400,041 |
|  | *pstC* | phosphate ABC transporter permease subunit PstC | 2,400,944-2,401,873 |
|  | *pstS* | Phosphate-binding protein PstS | 2,401,922-2,402,824 |
|  | *phoA* | alkaline phosphatase | 871,002-872,381 |
|  | *bglA* | 6-phospho-beta-glucosidase BglA | 2,011,029-2,012,471 |
| Potassium metabolism | *kdpD* | K+-sensing histidine kinase KdpD | 2,483,683-2,484,981 |
|  | *ktrA* | Ktr system potassium uptake protein A | 2,878,055-2,878,723 |
|  | *ktrC* | K+ transport system regulatory component | 2,901,934-2,902,920 |
|  | *ktrD* | Ktr system potassium uptake protein D | 1,243,901:1,245,253 |
| Siderophore | *fhuA* | Ferrichrome transport ATP-binding protein | 344,017-344,775 |
|  | *fhuC* | Ferrichrome transport ATP-binding protein fhuC | 3,089,244-3,090,470 |
|  | *fhuB* | Iron(3+)-hydroxamate import system permease protein FhuB | 3,101,827-3,102,882 |
|  | *fhuD* | Iron(3+)-hydroxamate-binding protein FhuD | 3,103,112-3,104,050 |
|  | *fhuG* | Iron(3+)-hydroxamate import system permease protein FhuG | 3,638,109-3,639,122 |
|  | *feuC* | Iron-uptake system permease protein feuC | 122,449-123,459 |
|  | *feuB* | Iron-uptake system permease protein feuB | 3,101,827-3,102,882 |
|  | *dhbA* | 2,3-dihydro-2,3-dihydroxybenzoate dehydrogenase | 2,973,767-2,974,552 |
|  | *entB* | Bifunctional isochorismate lyase | 2,969,959-2,970,885 |
|  | *dhbC* | isochorismate synthase | 2,972,547-2,973,743 |
|  | *dhbE* | 2,3-dihydroxybenzoate-AMP ligase | 2,970,903-2,972,528 |
|  | *dhbF* | nonribosomal peptide synthetase DhbF | 2,962,817-2,969,944 |
|  | *entC* | Isochorismate EntC | 2,859,319-2,860,731 |
| IAA production | *trpA* | tryptophan synthase alpha chain | 2,129,871-2,130,668 |
|  | *trpB* | tryptophan synthase beta chain | 2,130,661-2,131,863 |
|  | *trpC* | indole-3-glycerol phosphate synthase TrpC | 2,132,502-2,133,254 |
|  | *trpD* | anthranilate phosphoribosyltransferase | 2,133,247-2,134,263 |
|  | *trpE* | anthranilate synthase component I | 2,134,235-2,135,782 |
|  | *trpF* | phosphoribosylanthranilate isomerase | 2,131,844-2,132,497 |

**Online Resource 1 Table S3** Predicted genes associated with antagonistic characters in Bv. JN.Y2 genome

| Bv. JN.Y2-antifungal activities detection | Gene name | Gene annotation | Chromosome location |
| --- | --- | --- | --- |
| Hydrolases-Amylase | *amyA* | alpha-amylase | 243,500-244,972 |
| Hydrolases-Protease | *arpE* | subtilisin | 955,646-956,794 |
|  | *epr* | Minor extracellular protease epr | 3,619,891-3,621,612 |
|  | *vpr* | Minor extracellular protease vpr | 3,590,981-3,593,392 |
| Hydrolases-Cellulase | *celA* | Cellulase/cellobiase CelA1 | 3,451,923-3,452,564 |
|  | *celB* | cellobiose-specific IIC component | 3,618,371-3,619,684 |
|  | *celC* | cellobiose-specific IIA component | 3,642,280-3,642,597 |
|  | *celF* | 6-phospho-beta-glucosidase | 3,630,535-3,631,863 |
|  | *xynB* | xylan 1,4-beta-xylosidase | 1,753,065-1,754,480 |
|  | *-* | Endoglucanase | 1,819,859-1,821,160 |
| Hydrolases-Pectinase | *pel* | pectate lyase | 674,931-676,241 |
|  | *pgdB* | peptidoglycan deacetylase PgdB | 102,316-103,065 |
|  | *pgdA* | peptidoglycan deacetylase PgdA | 728,066-728,830 |
|  | *secY* | preprotein translocase subunit SecY | 86,990-88,261 |
|  | *tatA* | twin-arginine translocase TatA | 208,054-208,251 |
| Hydrolases-Chitinase | *yxkH* | polysaccharide deacetylase YxkH | 3,667,972-3,668,814 |
|  | *yheN* | Putative polysaccharide deacetylase YheN | 892,672-893,520 |
| *B. velezensis* JN.Y2 colonization-related chemotaxis | *cheA* | Chemotaxis protein CheA | 1,579,477-1,581,525 |
|  | *cheW* | Chemotaxis signal transduction protein CheW | 1,298,231-1,299,115 |
|  | *cheY* | Chemotaxis protein CheY | 1,570,552-1,570,914 |
|  | *mcpA* | Methyl-accepting chemotaxis protein | 2,888,470-2,890,455 |
|  | *mcpB* | Methyl-accepting chemotaxis protein McpB | 2,892,756-2,894,741 |
|  | *mcpC* | Methyl-accepting chemotaxis protein McpC | 1,288,188-1,290,230 |
|  | *fliM* | flagellar motor switch protein FliM | 1,568,383-1,569,381 |
|  | *fliN* | flagellar motor switch protein FliN | 1,569,371-1,570,525 |
|  | *fliG* | flagellar motor switch protein FliG | 1,560,934-1,561,950 |
| Quorum sensing(QS) | *comP* | Sensor histidine kinase ComP | 1,247,688-1,248,653 |
|  | *comA* | Competent response regulator ComA | 1,248,665-1,249,330 |
|  | *luxS* | S-ribosylhomocysteine lyase | 2,848,296-2,848,769 |
|  | *phrA* | phosphatase RapA inhibitor | 1,152,111-1,152,245 |
|  | *sinI* | Anti-repressor SinI/antagonist of SinR | 3,606,795-3,606,956 |
|  | *sinR* | HTH-type transcriptional regulator SinR | 2,377,824-2,378,192 |
| Biofilm formation | *tasA* | Major biofilm matrix component | 2,378,240-2,379,025 |
|  | *bslA* | Biofilm-surface layer protein A | 2,877,352-2,877,888 |
|  | *epsC* | polysaccharide biosynthesis protein EpsC | 3,229,683-3,231,476 |
|  | *epsD* | Glycosyltransferase EpsD | 3,228,528-3,229,667 |

**Online Resource 1 Table S4** Detailed characteristics of predicted GIs in Bv. JN.Y2 genome

| GI_id | Location | Start (bp) | End (bp) | Length (bp) | GC content (%) |
| --- | --- | --- | --- | --- | --- |
| GIs001 | Chr1 | 59, 092 | 94, 589 | 35, 498 | 44.06 |
| GIs002 | Chr1 | 439, 846 | 476, 770 | 36, 925 | 37.50 |
| GIs003 | Chr1 | 542, 413 | 550, 705 | 8, 293 | 41.93 |
| GIs004 | Chr1 | 1, 091, 788 | 1, 096, 423 | 4, 636 | 38.65 |
| GIs005 | Chr1 | 1, 530, 201 | 1, 539, 072 | 8, 872 | 46.45 |
| GIs006 | Chr1 | 2, 034, 353 | 2, 047, 768 | 13, 416 | 36.40 |
| GIs007 | Chr1 | 2, 066, 795 | 2, 071, 008 | 4, 214 | 44.49 |
| GIs008 | Chr1 | 2, 474, 316 | 2, 491, 746 | 17, 431 | 38.82 |
| GIs009 | Chr1 | 3, 145, 988 | 3, 150, 425 | 4, 438 | 35.08 |

**Online Resource 1 Table S5** Characteristics of predicted prophage regions identified in Bv. JN.Y2 genome

| Prophage_ID | Location | Start (bp) | End (bp) | Length (bp) | GC content (%) |
| --- | --- | --- | --- | --- | --- |
| Prophage_1 | Chr1 | 29, 352 | 103, 065 | 73, 714 | 46.00 |
| Prophage_2 | Chr1 | 397, 726 | 462, 938 | 65, 213 | 42.13 |
| Prophage_3 | Chr1 | 1, 086, 053 | 1, 098, 093 | 12, 041 | 42.40 |
| Prophage_4 | Chr1 | 1, 149, 403 | 1, 182, 839 | 33, 437 | 46.89 |
| Prophage_5 | Chr1 | 1, 496, 602 | 1, 618, 677 | 122, 076 | 46.82 |
| Prophage_6 | Chr1 | 1, 729, 690 | 1, 804, 731 | 75, 042 | 41.94 |
| Prophage_7 | Chr1 | 2, 031, 412 | 2, 118, 723 | 87, 312 | 44.05 |
| Prophage_8 | Chr1 | 2, 159, 239 | 2, 215, 731 | 56, 493 | 46.67 |
| Prophage_9 | Chr1 | 2, 340, 384 | 2, 385, 254 | 44, 871 | 46.41 |
| Prophage_10 | Chr1 | 2, 418, 720 | 2, 502, 566 | 83, 847 | 43.90 |
| Prophage_11 | Chr1 | 3, 315, 861 | 3, 341, 349 | 25, 489 | 44.67 |
| Prophage_12 | Chr1 | 3, 406, 642 | 3, 442, 531 | 35, 890 | 46.43 |
| Prophage_13 | Chr1 | 3, 449, 253 | 3, 458, 183 | 8, 931 | 45.47 |


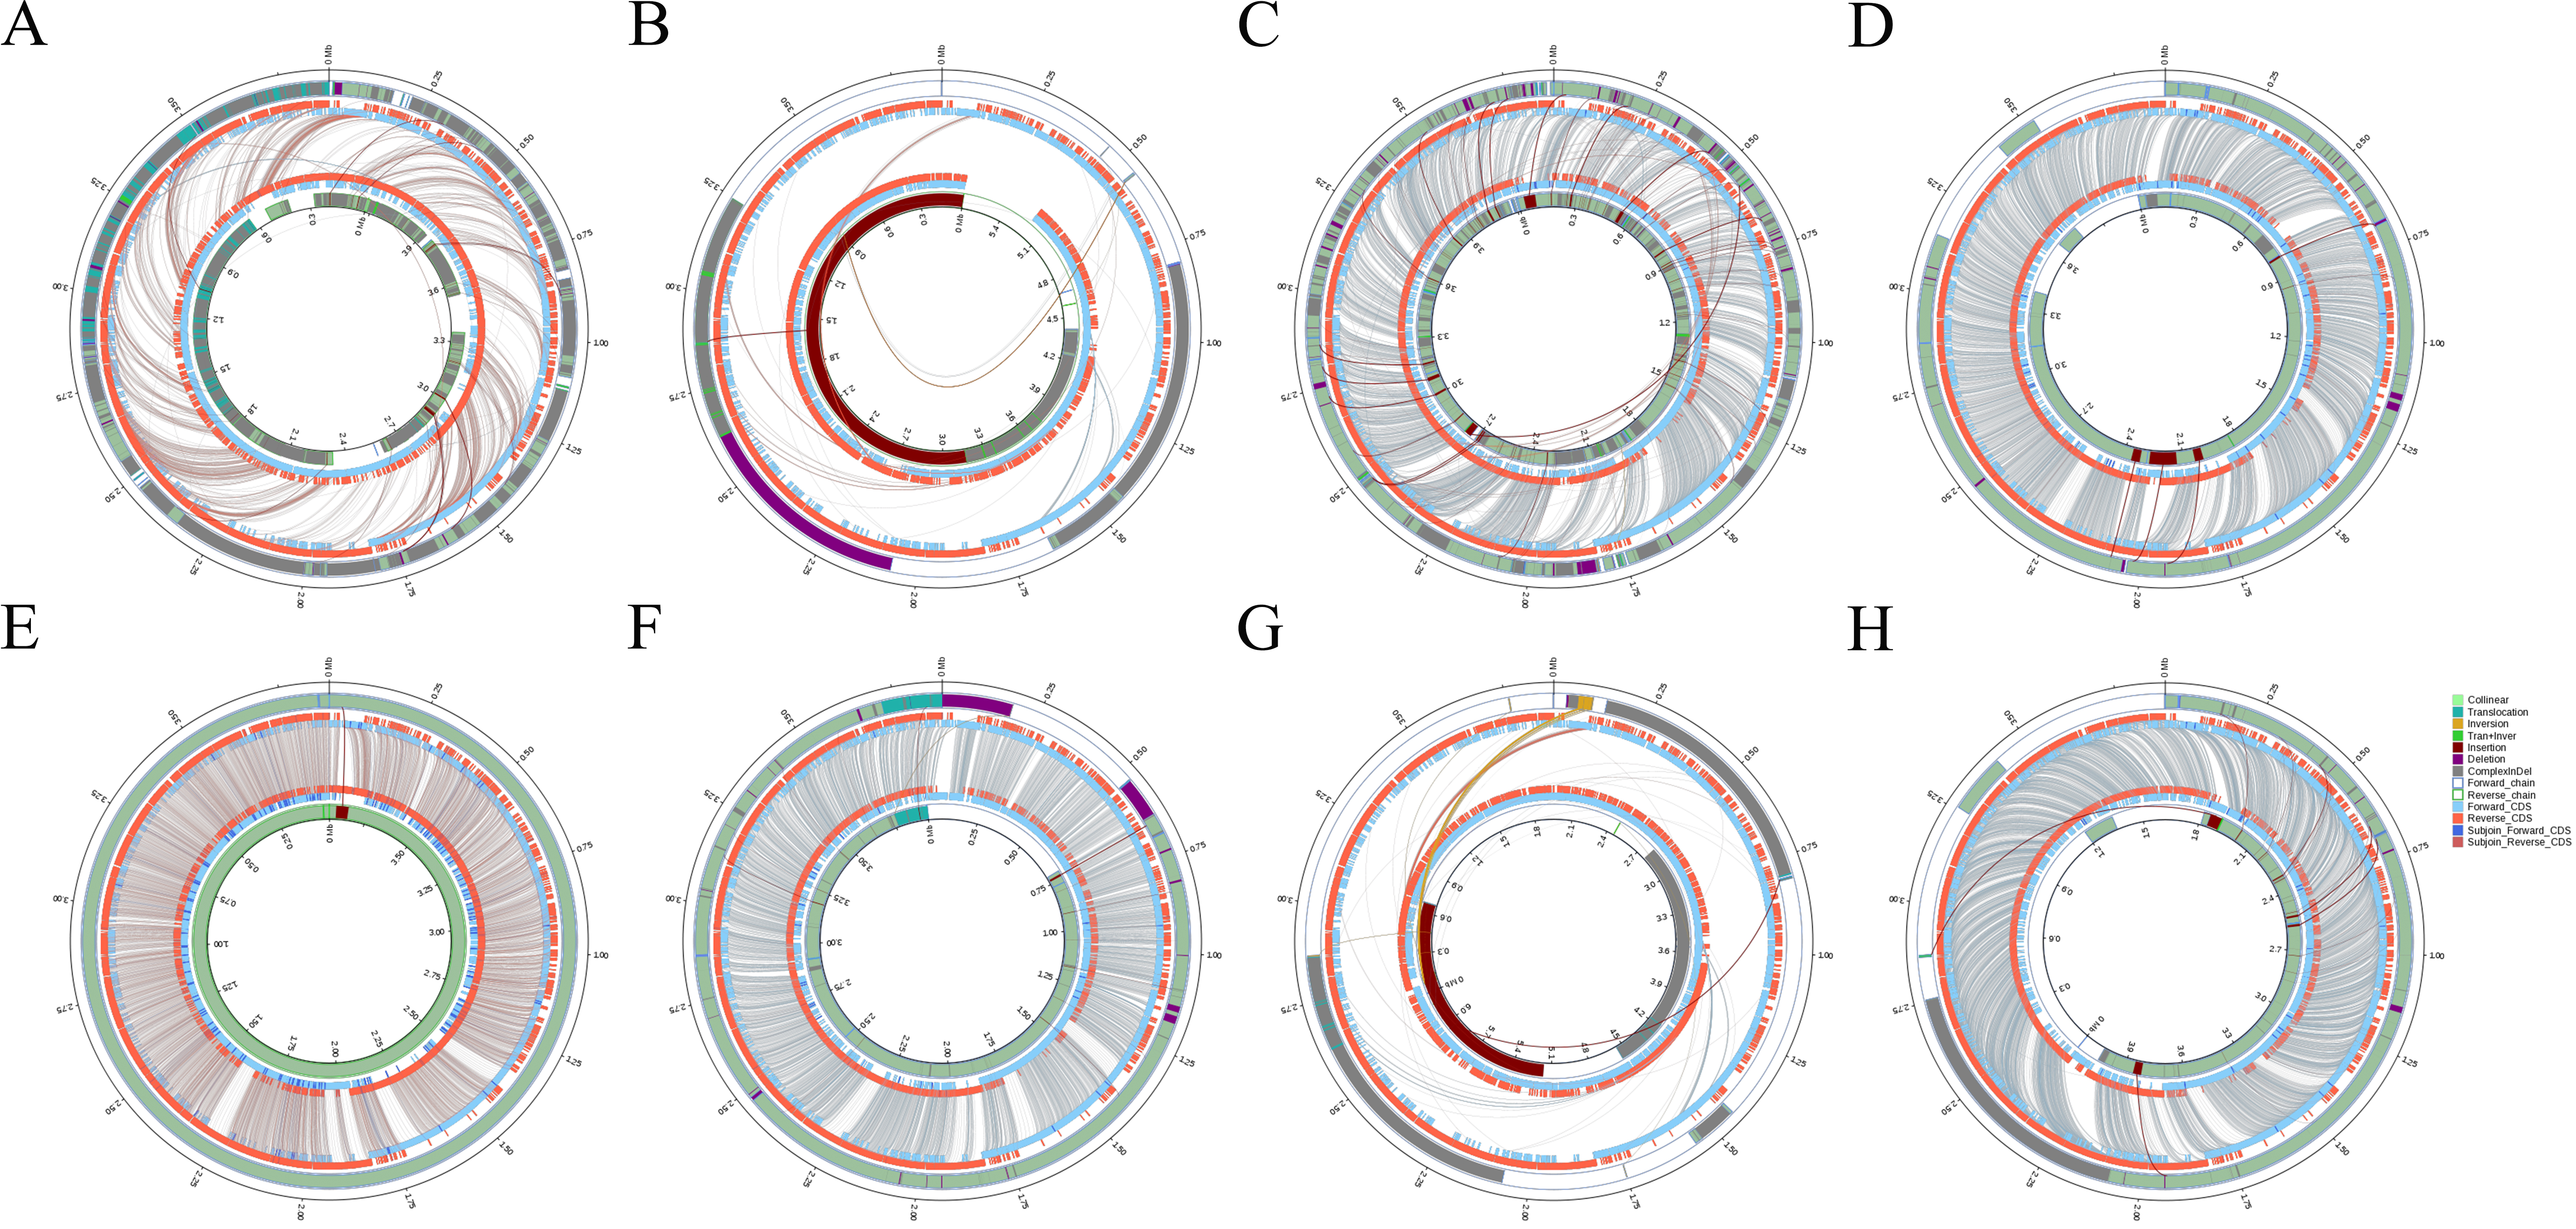


**Note:** **(A-H)** represents Structural variations between Bv. JN.Y2 and Bl.14580, Bm.BPN36.3, Bs.168, Bv.SQR9, Bv.CBMB205, Bv.FZB42, Bt.10792 and Ba.GKT04, respectively. The inner circle represents the query genome, while the outer circle represents the reference genome. Different colored bands connecting the two circles indicate various genomic rearrangements: Collinear (syntenic regions), Translocation (translocated regions), Inversion (inverted regions), and Tran+Inver (translocated and inverted regions). Insertion and Deletion refer to insertions and deletions of at least 50 bp, respectively. ComplexInDel indicates unaligned but spatially corresponding regions. The directional chains are defined as follows: Forward_chain for sequences on the forward strand with coordinates increasing clockwise, and Reverse_chain for sequences on the reverse strand with coordinates increasing counter-clockwise. Coding sequences (CDS) are further annotated: Forward_CDS and Reverse_CDS represent CDS on the forward and reverse strands, respectively. Subjoin_Forward_CDS and Subjoin_Forward_CDS denote additional CDS from the forward and reverse strands. In cases where the paired sequences of DeleteGene or InsertGene have 100% identity, they are annotated as supplementary CDS.

**Online Resource 1 Figure S1** Structural variations between Bv. JN.Y2 and eight conparative *Bacillus* strains
