# Supplementary material
Source: Research Square preprint supplement (doi:10.21203/rs.3.rs-9114671/v1)
Supplement: Supplementary file 2 [file f4bb6bca81f4b38bcabfd736.docx]

**Supplementary Information**

**Manuscript ID:** b87fe9d9-15a6-4cd3-b2bf-96a321577acd

This original image is provided as a supplementary file to fulfill the journal's requirement for the presentation of full, uncropped gels.


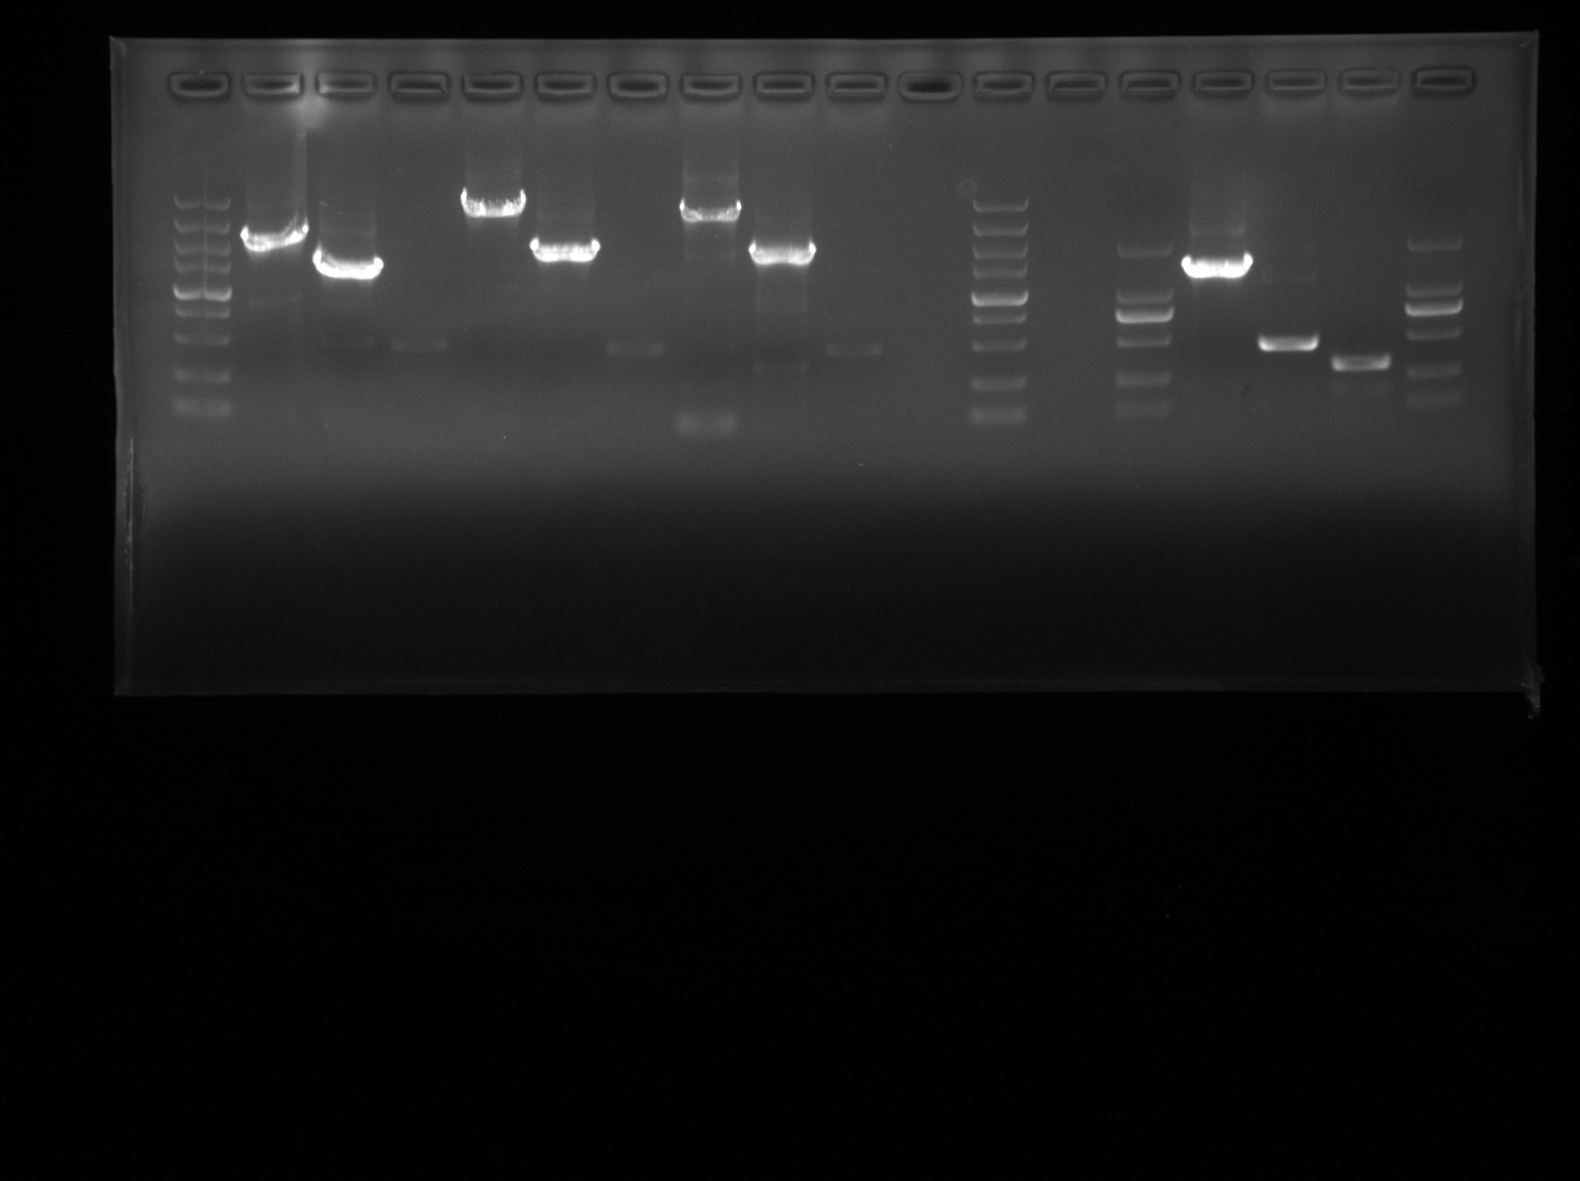


**Note:** This figure shows the full, uncropped agarose gel electrophoresis image to support the data integrity of the manuscript. **Lanes 1–13:** These lanes contain PCR products from other unrelated experiments and are not discussed in this study. **Lane 14:** DL 2000 DNA Marker. The visible bands (from top to bottom) correspond to 2000, 1000, 750, 500, 250, and 100 bp, which provide a size reference for the samples. **Lane 15:** PCR amplification product of the 16S ribosomal RNA gene from Bv. JN.Y2. **Lanes 16–18:** Other PCR products not relevant to the current manuscript.

**Fig S1** Original uncropped gel image for the amplification of 16S ribosomal RNA gene.
